# Supplementary material for: Polish Translation and Validation of the Mini Sarcopenia Risk Assessment (MSRA) Questionnaire to Assess Nutritional and Non-Nutritional Risk Factors of Sarcopenia in Older Adults
Source: PubMed Central journal article supplement (PMC8064359; doi:10.3390/nu13041061), 2021-03-24
Supplement: nutrients-13-01061-s001.pdf [file nutrients-13-01061-s001.pdf]

S1Table. Polish Version of Mini Sarcopenia Risk Assessment (MSRA) Questionnaire

| <b>KWESTIONARIUSZ MSRA - KRÓTKA OCENA RYZYKA SARKOPENII</b>                                                                                                                                                                                                                                                                                                                                                                                                                                                                                                                                                                                                                  |                                                                                                                                                                |                                    |
|------------------------------------------------------------------------------------------------------------------------------------------------------------------------------------------------------------------------------------------------------------------------------------------------------------------------------------------------------------------------------------------------------------------------------------------------------------------------------------------------------------------------------------------------------------------------------------------------------------------------------------------------------------------------------|----------------------------------------------------------------------------------------------------------------------------------------------------------------|------------------------------------|
| <b>kwestionariusz 7- elementowy (PL-MSRA-7) i 5-elementowy (PL-MSRA-5)</b>                                                                                                                                                                                                                                                                                                                                                                                                                                                                                                                                                                                                   |                                                                                                                                                                |                                    |
| <b>Elementy oceny</b>                                                                                                                                                                                                                                                                                                                                                                                                                                                                                                                                                                                                                                                        | <b>punktacja dla<br/>PL-MSRA-7</b>                                                                                                                             | <b>punktacja dla<br/>PL-MSRA-5</b> |
| <b>1. Ile Pan/Pani ma lat?</b>                                                                                                                                                                                                                                                                                                                                                                                                                                                                                                                                                                                                                                               | ≥70 lat<br><70 lat                                                                                                                                             | 0<br>5                             |
| <b>2. Czy był Pan/Pani leczony/a w szpitalu w ostatnim roku?</b>                                                                                                                                                                                                                                                                                                                                                                                                                                                                                                                                                                                                             | Tak, więcej niż jeden raz<br>Tak, jeden raz<br>Nie                                                                                                             | 0<br>5<br>10                       |
| <b>3. Jaki jest poziom Pani/Pana aktywności fizycznej?</b>                                                                                                                                                                                                                                                                                                                                                                                                                                                                                                                                                                                                                   | Jest w stanie przejść mniej niż 1000 metrów<br>Jest w stanie przejść więcej niż 1000 metrów                                                                    | 0<br>5                             |
| <b>4. Czy regularnie zjada Pan/Pani 3 posiłki dziennie?</b><br>(np. nie jem śniadania, ewentualnie piję tylko kawę/herbatę lub wypijam na obiad tylko kubek zupy)                                                                                                                                                                                                                                                                                                                                                                                                                                                                                                            | Nie, do dwóch razy na tydzień pomijam posiłek<br>Tak                                                                                                           | 0<br>5                             |
| <b>5. Czy spożywa Pan/Pani:</b>                                                                                                                                                                                                                                                                                                                                                                                                                                                                                                                                                                                                                                              | Mleko lub produkty mleczne (jogurt, ser), ale nie codziennie<br>Mleko lub produkty mleczne(jogurt, ser), co najmniej raz dziennie                              | 0<br>5                             |
| <b>6. Czy spożywa Pan/Pani:</b>                                                                                                                                                                                                                                                                                                                                                                                                                                                                                                                                                                                                                                              | Drób, mięso/wędliny, ryby, jaja lub rośliny strączkowe, ale nie codziennie<br>Drób, mięso/wędliny, ryby, jaja lub rośliny strączkowe, co najmniej raz dziennie | 0<br>5                             |
| <b>7. Czy schudł/a Pan/Pani w ostatnim roku?</b>                                                                                                                                                                                                                                                                                                                                                                                                                                                                                                                                                                                                                             | >2 kg<br>nie lub ≤2 kg                                                                                                                                         | 0<br>5                             |
| <b>Suma punktów</b>                                                                                                                                                                                                                                                                                                                                                                                                                                                                                                                                                                                                                                                          |                                                                                                                                                                |                                    |
| <b>Interpretacja wyniku:</b>                                                                                                                                                                                                                                                                                                                                                                                                                                                                                                                                                                                                                                                 |                                                                                                                                                                |                                    |
| <ul style="list-style-type: none"> <li>• kwestionariusz MSRA ma dwie wersje: pełną (złożoną z 7 elementów, o nazwie MSRA-7) i krótką (złożoną z 5 elementów, o nazwie MSRA-5).</li> <li>• wartości 0, 5 lub 10 punktów są przypisane do elementów w skali MSRA-7, podczas gdy wartości 0, 5, 10 lub 15 punktów są przypisane do elementów w skali MSRA-5.</li> <li>• łączny wynik dla PL-MSRA-7 może wynosić minimalnie 0 punktów, a maksymalnie 40 punktów; wynik ≤30 punktów wskazuje na ryzyko sarkopenii</li> <li>• łączny wynik dla PL- MSRA-5 może wynosić minimalnie 0 punktów, a maksymalnie 60 punktów; wynik ≤ 45 punktów wskazuje na ryzyko sarkopenii</li> </ul> |                                                                                                                                                                |                                    |
